# Supplementary material for: Genomic prediction and allele mining of agronomic and morphological traits in pea (Pisum sativum) germplasm collections
Source: Frontiers journal article supplement (doi:10.3389/fpls.2023.1320506), 2023-12-22

**Supplementary Figure 2.** Quantile-Quantile plots of expected vs. observed association scores of 41,114 SNPs for five quantitative traits. The red line represents equality between the expected and observed quantiles and the grey area the associated 95% confidence interval.

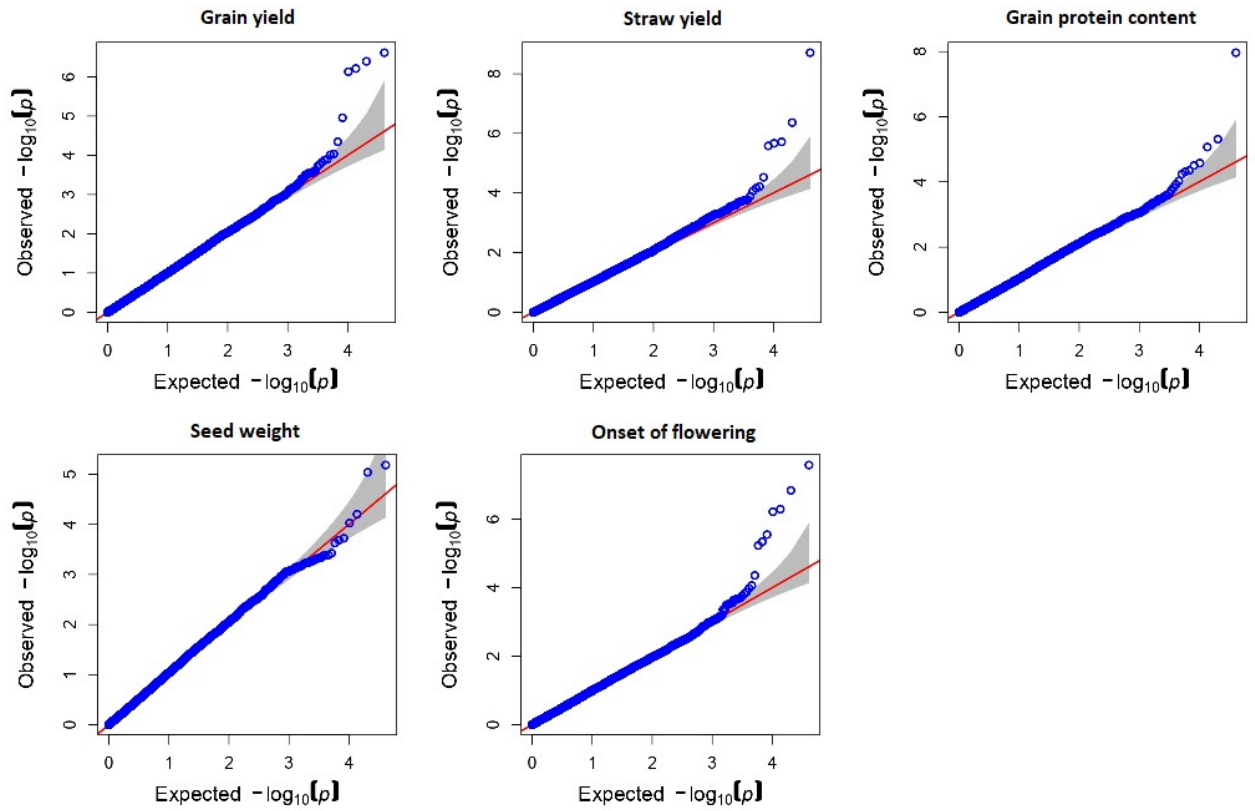

Supplement: Image_2.pdf [file Image_2.pdf]
