# Supplementary material for: Genomic prediction and allele mining of agronomic and morphological traits in pea (Pisum sativum) germplasm collections
Source: Frontiers journal article supplement (doi:10.3389/fpls.2023.1320506), 2023-12-22

**Supplementary Figure 3.** Cross-entropy criterion for increasing K values based on the molecular data of 11,072 SNPs for a worldwide pea germplasm collection of 220 landraces from 19 regional pools and 11 modern cultivars.

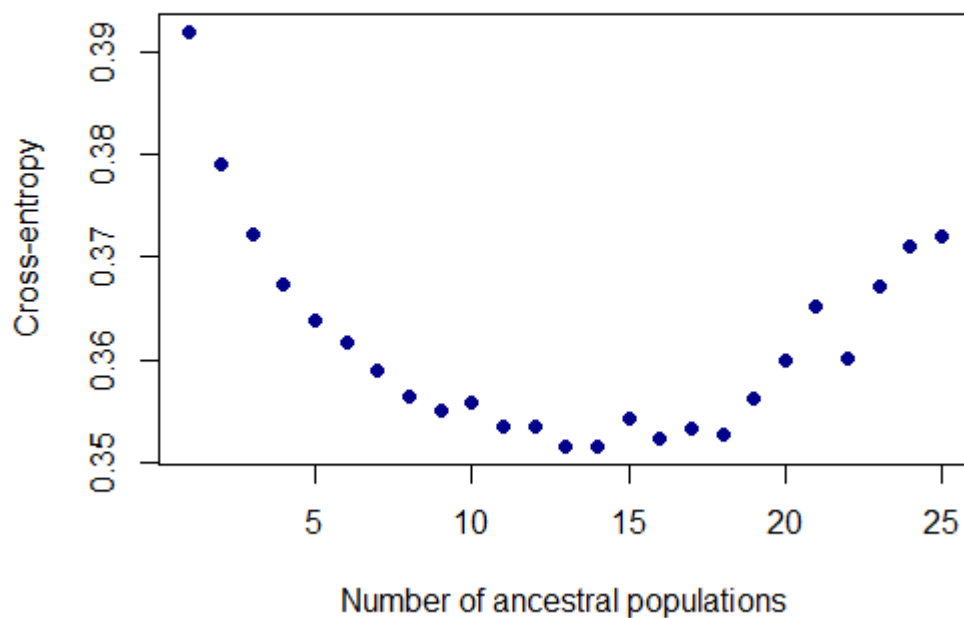

Supplement: Image_3.pdf [file Image_3.pdf]
