# Supplementary material for: Genomic prediction and allele mining of agronomic and morphological traits in pea (Pisum sativum) germplasm collections
Source: Frontiers journal article supplement (doi:10.3389/fpls.2023.1320506), 2023-12-22

**Supplementary Figure 4.** Plots of linkage disequilibrium ( $r^2$ ) decay with physical distance for pea chromosomes.  $r^2$  was estimated on pairwise combinations of 41,114 SNPs within a 100 kb window for a worldwide germplasm collection of 220 landraces from 19 regional pools and 11 modern cultivars.

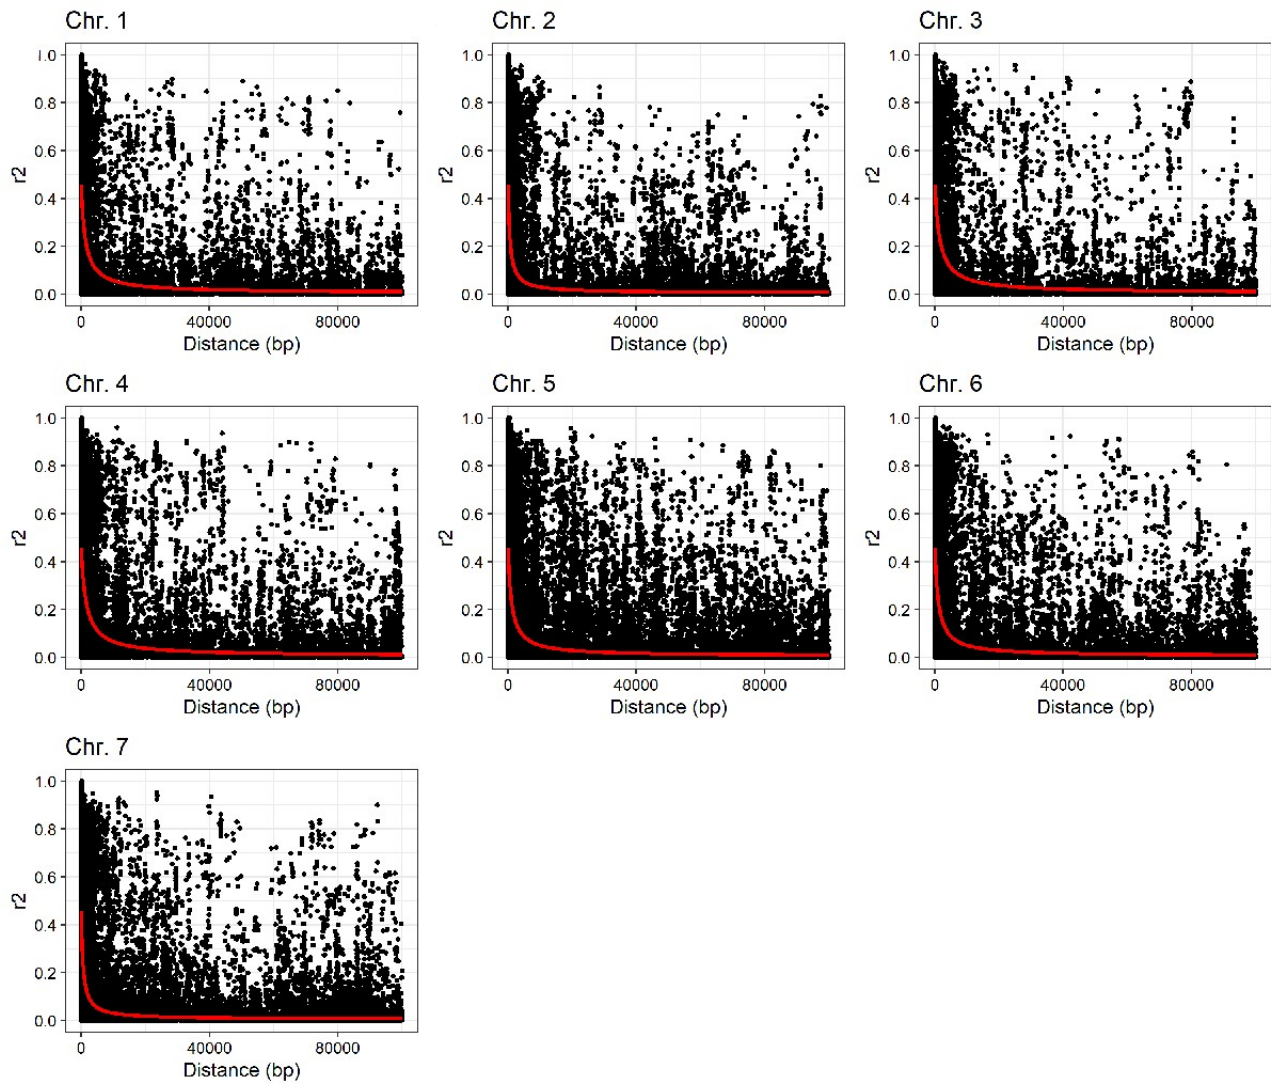

Supplement: Image_4.pdf [file Image_4.pdf]
