# Supplementary material for: Genomic prediction and allele mining of agronomic and morphological traits in pea (Pisum sativum) germplasm collections
Source: Frontiers journal article supplement (doi:10.3389/fpls.2023.1320506), 2023-12-22

**Supplementary Figure 6.** Manhattan plots showing the non-significant association scores of 41,114 SNPs with two qualitative and one quantitative trait along pea chromosomes for a GWAS based on a worldwide germplasm collection of 220 landraces from 19 regional pools and 11 modern cultivars.

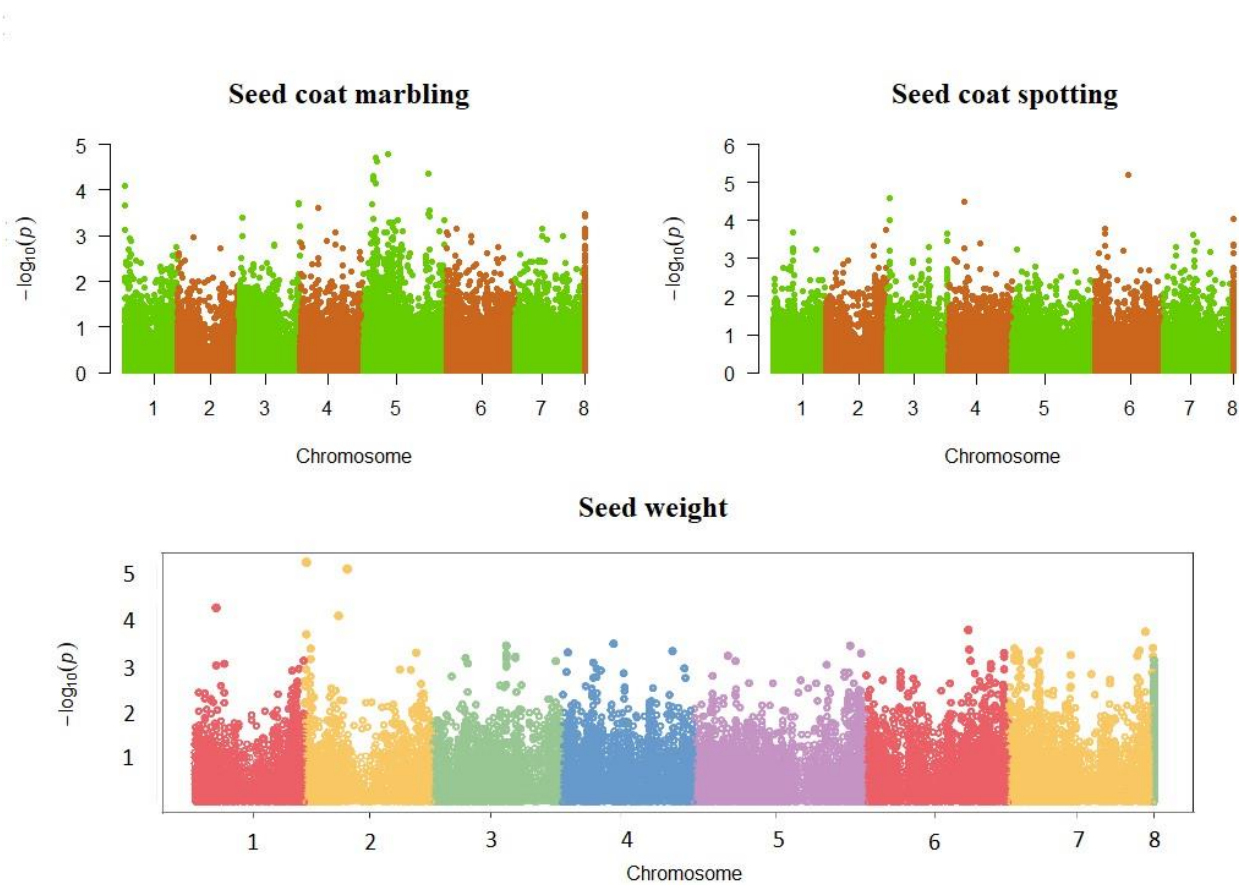

Supplement: Image_6.pdf [file Image_6.pdf]
