# Supplementary material for: Genomic prediction and allele mining of agronomic and morphological traits in pea (Pisum sativum) germplasm collections
Source: Frontiers journal article supplement (doi:10.3389/fpls.2023.1320506), 2023-12-22
Supplement: Table_3.pdf [file Table_3.pdf]

**Supplementary Table 3.** List of genes potentially associated to the significant SNPs detected by a GWAS based on 41,114 SNPs and performed on a worldwide pea germplasm collection of 220 landraces from 19 regional pools and 11 modern cultivars for seven qualitative and four quantitative traits. Candidate genes were identified either by scanning a region as long as the average chromosome distance at which LD dropped to 0.05 in both directions from each significant SNP, or by verifying SNP linkage with previously cloned loci, and are reported with their annotated function (<https://urgi.versailles.inra.fr/>). For qualitative traits, the genomic region surrounding the most significant SNP in each peak was scanned for candidate gene research.

| SNP                  | Scanned interval             | Trait                                             | Gene            | Cloned | Function                                               |
|----------------------|------------------------------|---------------------------------------------------|-----------------|--------|--------------------------------------------------------|
| chr6LG2_27407716     | chr6LG2:27397583..27417849   | Stipule pigmentation                              | Psat6g034040    | no     | Flavin-binding monooxygenase-like                      |
| chr6LG2_235650075    | chr6LG2:235639871..235660137 | Stipule and standard pigmentation                 | Psat6g125800    | no     | Xylanase inhibitor C-terminal                          |
| chr6LG2_68307452     | -                            | Stipule, standard, and keel and wing pigmentation | Psat6g060480    | yes    | BHLH-MYC and R2R3-MYB transcription factors N-terminal |
| chr1LG6_356439618    | -                            | Hilum pigmentation                                | Psat1g206360    | yes    | Protein of unknown function (DUF_B2219)                |
| chr6LG2_68265355     | -                            | Seed coat pigmentation                            | Psat6g060480    | yes    | BHLH-MYC and R2R3-MYB transcription factors N-terminal |
| chr6LG2_235650004    | chr6LG2:235639871..235660137 | Seed coat pigmentation                            | Psat6g125800    | no     | Xylanase inhibitor C-terminal                          |
| chr3LG5_65566666     | -                            | Cotyledon wrinkling                               | Psat3g034640    | yes    | Alpha amylase + C-terminal all-beta domain             |
| scaffold01735_103693 | -                            | Onset of flowering                                | Psat0s1735g0240 | no     | ZIP Zinc transporter                                   |
| chr5LG3_507674783    | chr5LG3:507664733..507684833 | Onset of flowering                                | Psat5g255760    | no     | NA                                                     |
| chr4LG4_252131852    | chr4LG4:252117658..252146046 | Onset of flowering                                | Psat4g132240    | no     | Alpha-amylase C-terminal beta-sheet domain             |
| chr6LG2_374770044    | chr6LG2:374759911..374780177 | Onset of flowering                                | Psat6g186000    | no     | Unknown gene                                           |

|                     |                              |                          |              |    |                                                                                          |
|---------------------|------------------------------|--------------------------|--------------|----|------------------------------------------------------------------------------------------|
| chr6LG2_374770044   | chr6LG2:374759911..374780177 | Onset of flowering       | Psat6g186040 | no | Protein of unknown function (DUF410)                                                     |
| chr6LG2_72901872    | chr6LG2:72891739..72912005   | Straw yield; grain yield | Psat6g064800 | no | Helix-loop-helix DNA-binding domain                                                      |
| scaffold00384_33569 | -                            | Straw yield              | NA           | no | NA                                                                                       |
| chr1LG6_47025851    | chr1LG6:47013992..47037710   | Grain yield              | Psat1g031400 | no | Protein kinase domain<br>RNA recognition motif.<br>(a.k.a. RRM + RBD + or<br>RNP domain) |
| chr4LG4_186752146   | chr4LG4:186737952..186766340 | Grain yield              | Psat4g098400 | no | No apical meristem (NAM)<br>protein                                                      |
| chr7LG7_183744462   | chr7LG7:183738959..183749965 | Grain yield              | Psat7g111400 | no |                                                                                          |
| chr5LG3_492526140   | chr5LG3:492516090..492536190 | Protein content          | Psat5g246720 | no | Rhomboid family                                                                          |
